# Supplementary material
Source: PubMed Central journal article supplement (PMC4248878)
Supplement: JB.02194-14_zjb999093377so1.pdf [file JB.02194-14_zjb999093377so1.pdf]

Table S1. The pH and temperature optima for the  $\beta$ -glycoside hydrolases.

| Enzyme  | Optimal pH | Optimal<br>temperature |
|---------|------------|------------------------|
| CfXyl3A | 7.0        | 50°C                   |
| CfBgl3A | 7.5        | 55°C                   |
| CfBgl3B | 6.5        | 30°C                   |
| CfBgl3C | 7.0        | 30°C                   |
| CfBgl1  | 7.5        | 40°C                   |

These activities were measured using *p*NP-glycoside substrates.

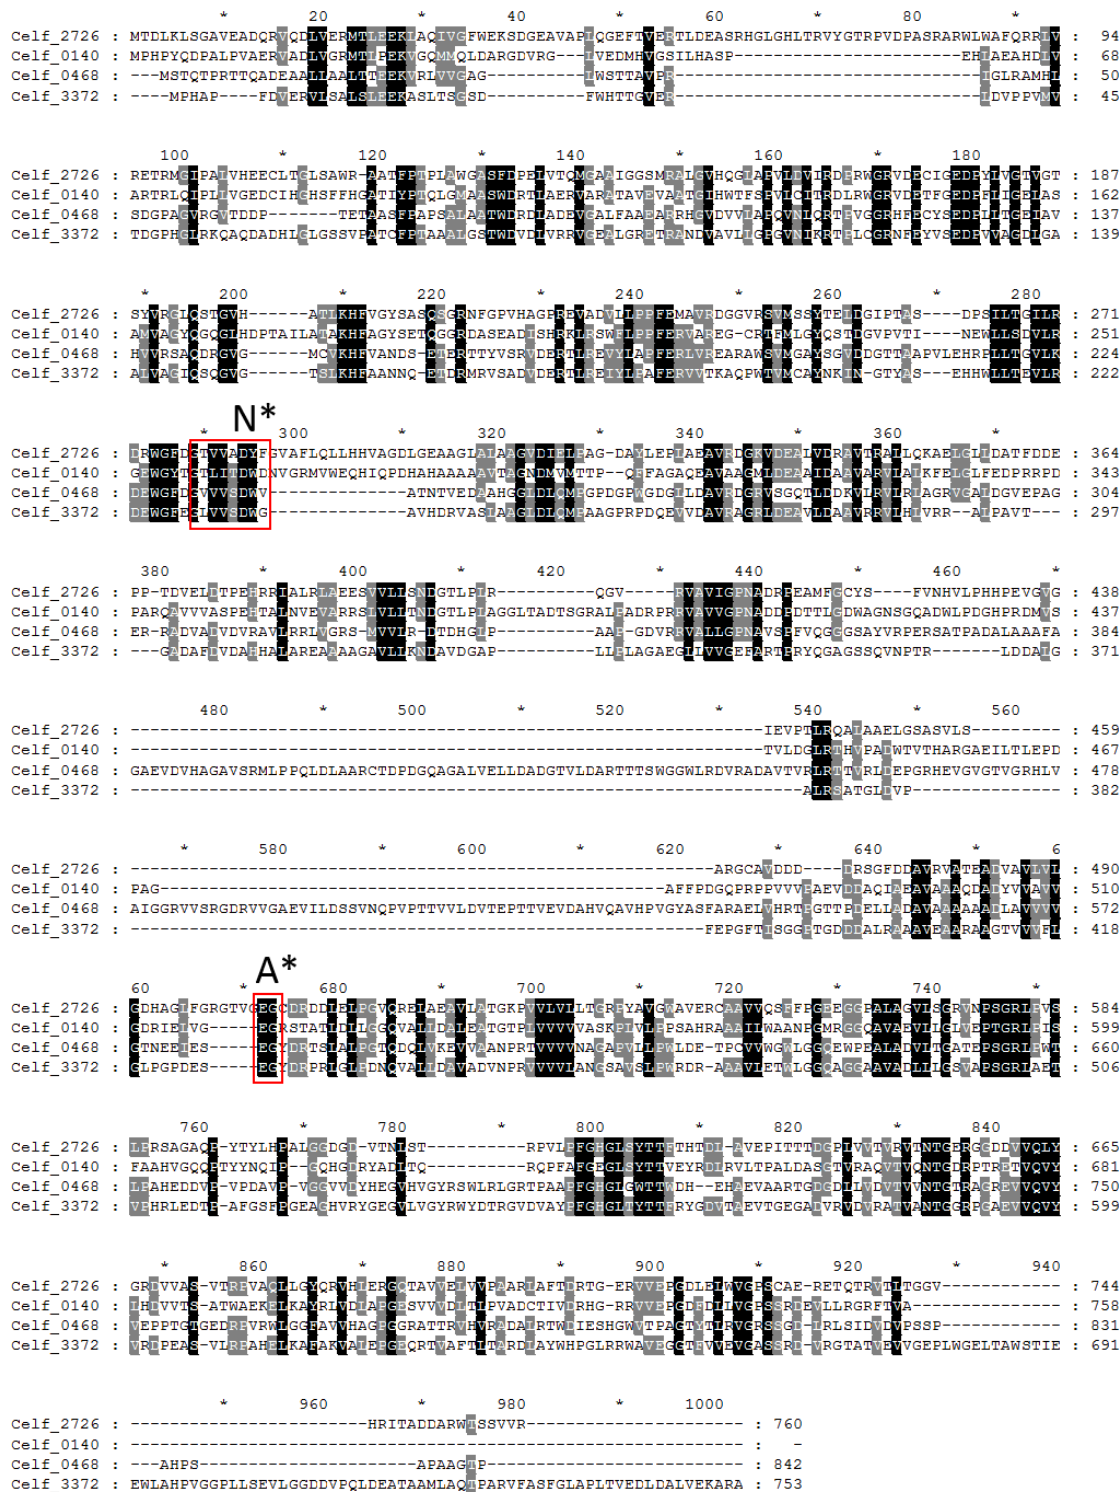

Fig. S1 Multiple amino acid sequence alignment of four GH3 family enzymes from *C. fimi* ATCC484. Dark shading indicates highly conserved residues in all sequences, lighter shading indicated conserved residues in 3 of the 4 sequences. Alignment was generated using ClustalX2.1 and formatted with Genedoc. Putative catalytic residues are labelled as N\* for nucleophile and A\* as acid/base catalyst.

Supplemental Tables and Figures for Gao and Wakarchuk. J. Bacteriology August 2014

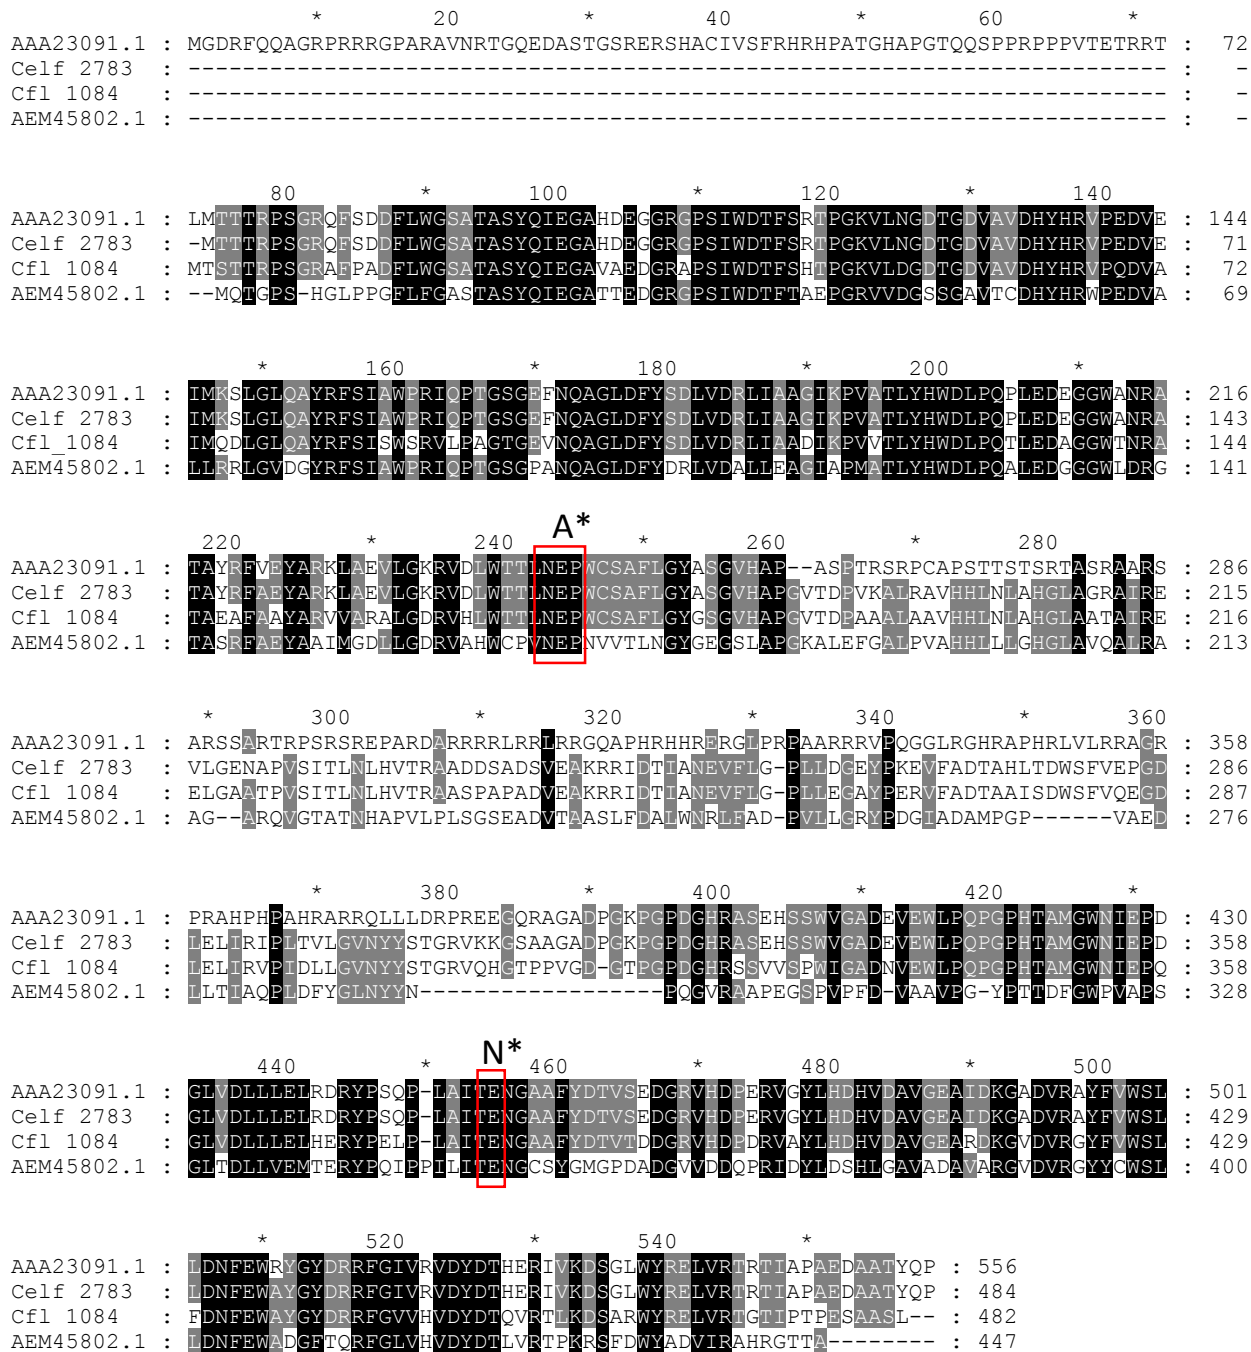

Fig. S2. Multiple amino acid sequence alignment of GH1 family enzymes. The GH1 protein sequences from *C. fimi* ATCC484, *C. flavigena* ATCC482, and Genebank entries AAA23091.1, putative *C. fimi* GH1, and AEM45802.1, GH1 from *Cellulomonas biazotea*. Dark shading indicates highly conserved residues in all sequences, lighter shading indicated conserved residues in 3 of the 4 sequences. Putative catalytic residues are labelled as N\* for nucleophile and A\* as acid/base catalyst. The alignment was generated using ClustalX2.1 and Genedoc.

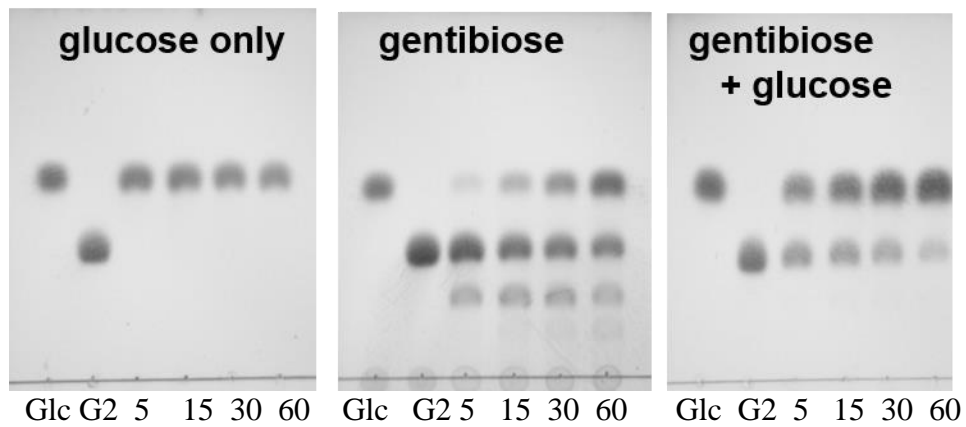

Figure S3. Inhibition of transglycosylation of CfBgl3B gentibiose by glucose. CfBgl3B was incubated with 25 mg/ml glucose, 5 mg/ml gentibiose, or a mixture of the two sugars. The reaction progress was followed by TLC.
